# Supplementary material for: Photophysical and thermal properties of novel solid state fluorescent benzoxazole based styryl dyes from a DFT study
Source: Royal Society of Chemistry journal article supplement (doi:10.1039/c4ra12908c), 2015-01-01

## **Photophysical and thermal properties of novel solid state fluorescent benzoxazole based styryl dyes with DFT study**

**Urmiladevi Narad Yadav<sup>a</sup>, Haribhau Shantaram Kumbhar<sup>a</sup>, Saurabh Satish**

**Deshpande<sup>a</sup>, Suban Kumar Sahoo<sup>b</sup>, Ganapati Subray Shankarling<sup>a,\*</sup>**

*<sup>a</sup>Dyestuff Technology Department, Institute of Chemical Technology, Matunga,  
Mumbai 400 019, India*

*<sup>b</sup>Department of Applied Chemistry, SV National Institute of Technology (SVNIT),  
Surat-395007, India.*

\*Corresponding author (Dr. GS Shankarling) E-mail addresses:  
gsshankarling@gmail.com, gs.shankarling@ictmumbai.edu.in Tel.: +91 2233612708;  
fax: +91 22 33611020.

### **Table of Contents**

|                                                                                     |                   |
|-------------------------------------------------------------------------------------|-------------------|
| <b>1. Absorbance and emission spectra of compounds 6a-6e (Fig. S1-Fig. S5).....</b> | <b>Page 2-5</b>   |
| <b>2. Photochemical stability study spectra (Fig. S6).....</b>                      | <b>Page 5-6</b>   |
| <b>3. FT-IR spectra.....</b>                                                        | <b>Page 7-9</b>   |
| <b>4. HR-MS spectra.....</b>                                                        | <b>Page 9-11</b>  |
| <b>5. <sup>1</sup>H-NMR spectra.....</b>                                            | <b>Page 12-18</b> |
| <b>6. <sup>13</sup>C-NMR spectra.....</b>                                           | <b>Page 18-20</b> |

### 1. Absorbance and emission spectra of compounds **6a-6e**

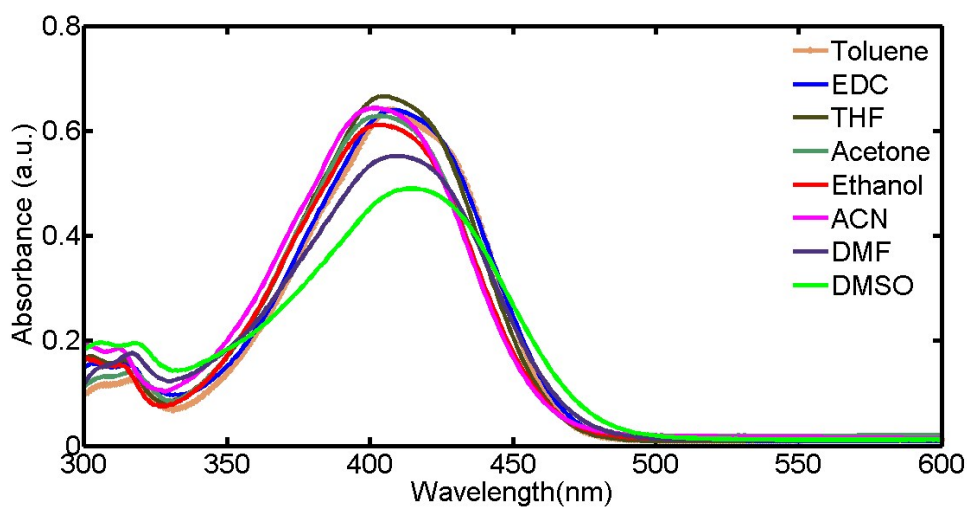

Figure S1(a). Absorption studies of dye **6a** in different solvents.

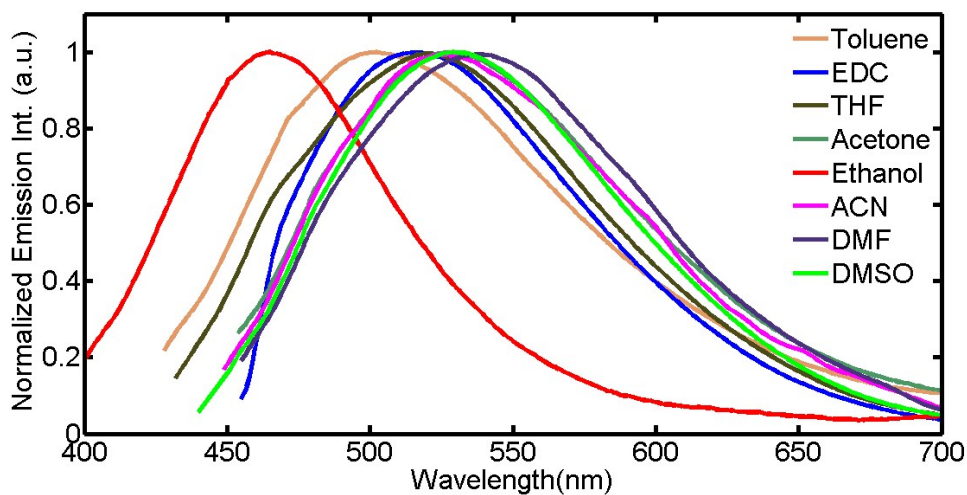

Figure S1(b). Emission studies of dye **6a** in different solvents.

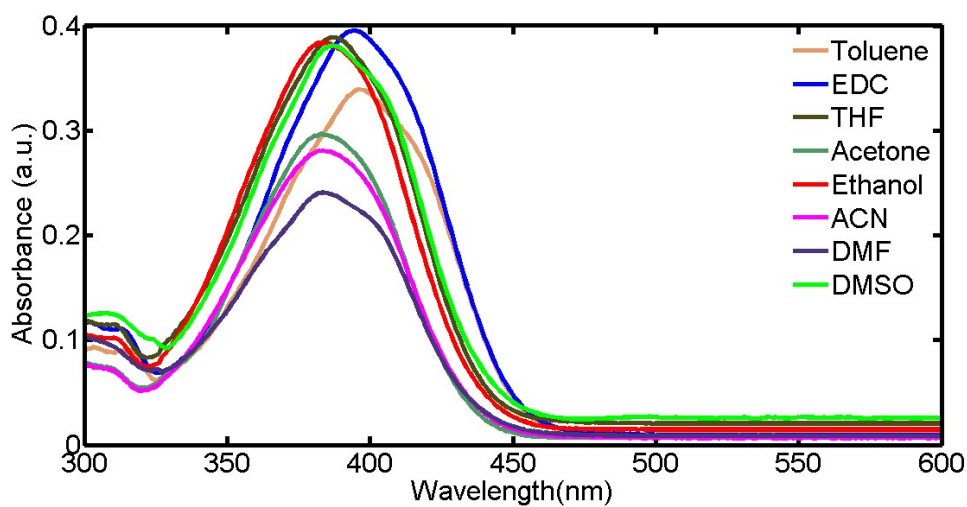

Figure S2(a). Absorption studies of dye **6b** in different solvents.

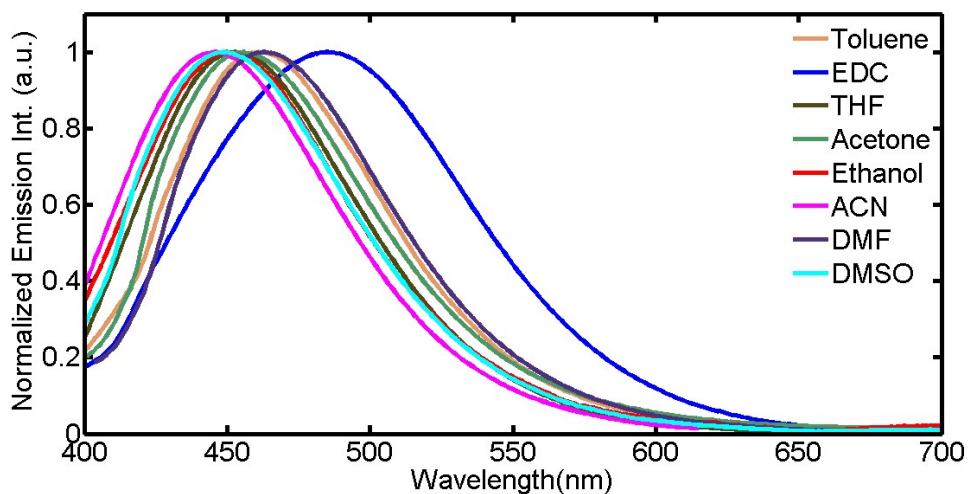

Figure S2(b). Emission studies of dye **6b** in different solvents.

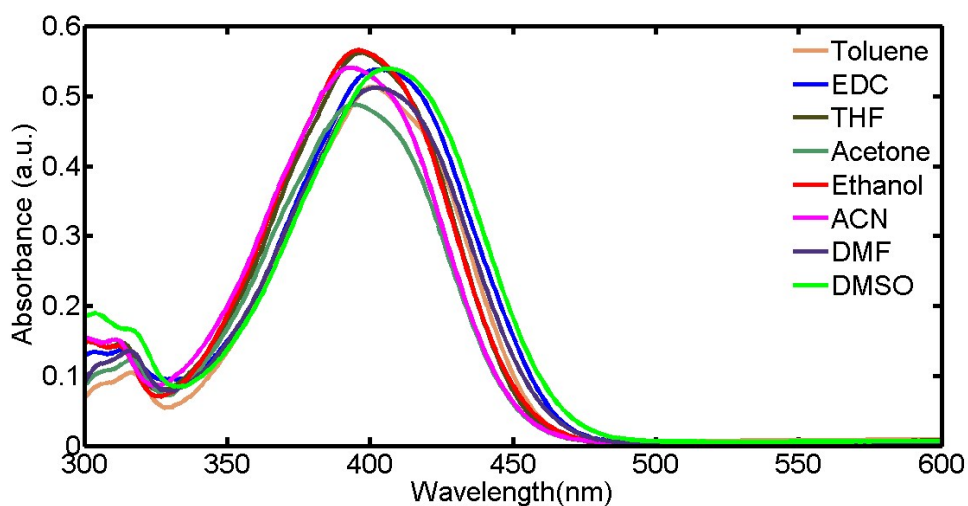

Figure S3(a) Absorption studies of dye **6c** in different solvents.

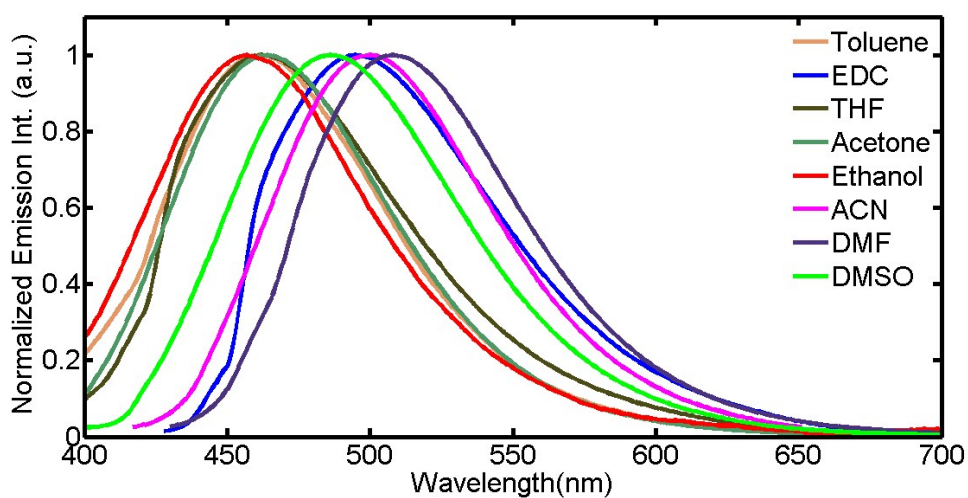

Figure S3(b). Emission studies of dye **6c** in different solvents.

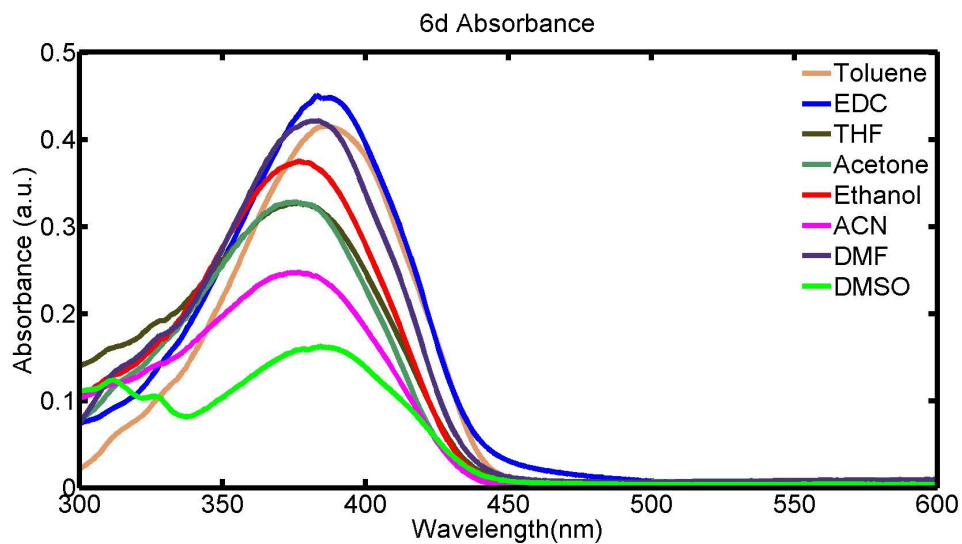

Figure S4(a). Absorption studies of dye **6d** in different solvents.

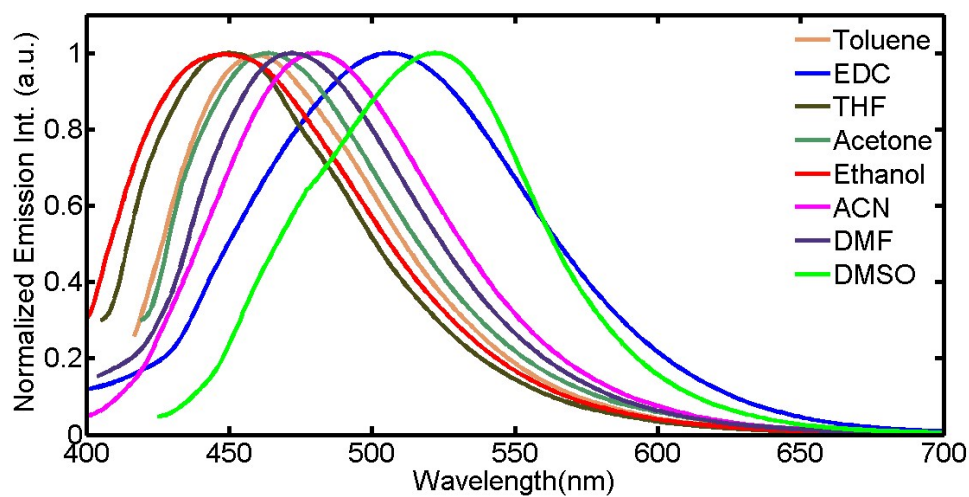

Figure S4(b). Emission studies of dye **6d** in different solvents.

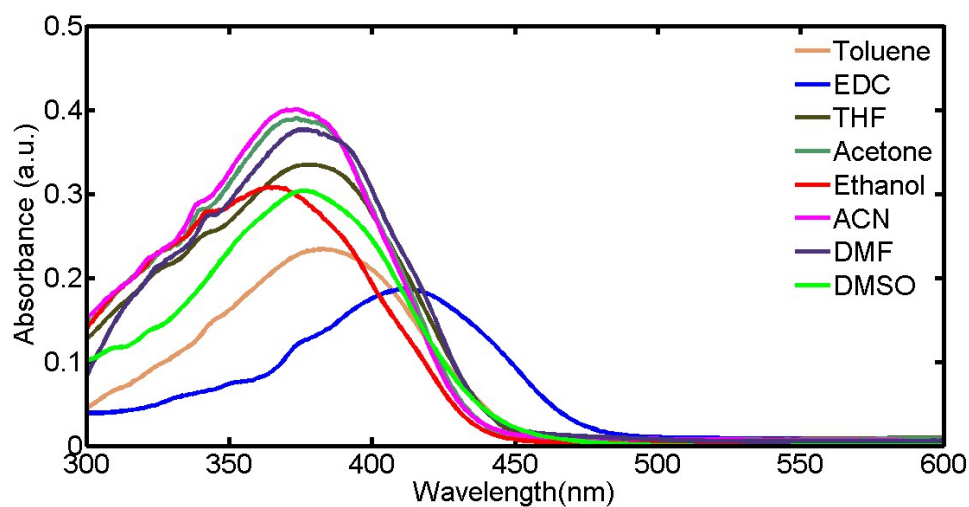

Figure S5(a). Absorption studies of dye **6e** in different solvents.

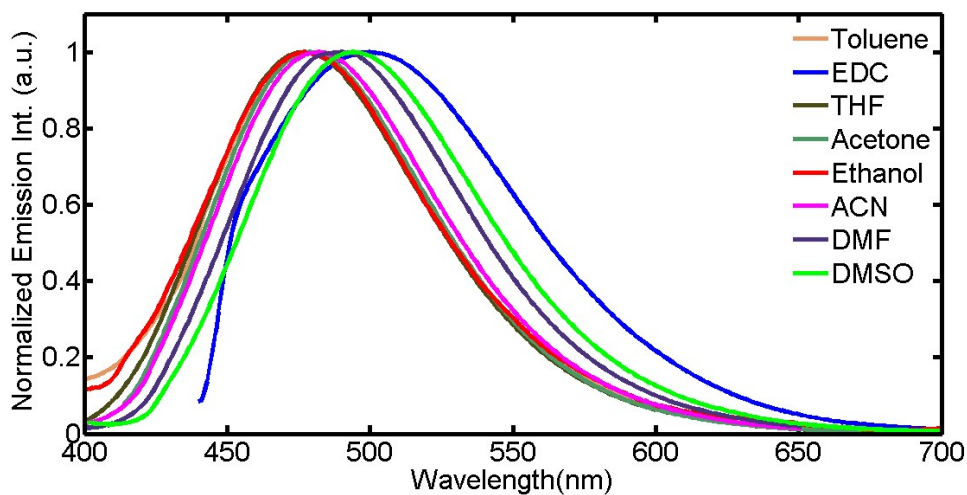

Figure S5(b). Emission studies of dye **6e** in different solvents.

## 2. Photochemical stability study spectra of compounds 6a-6e

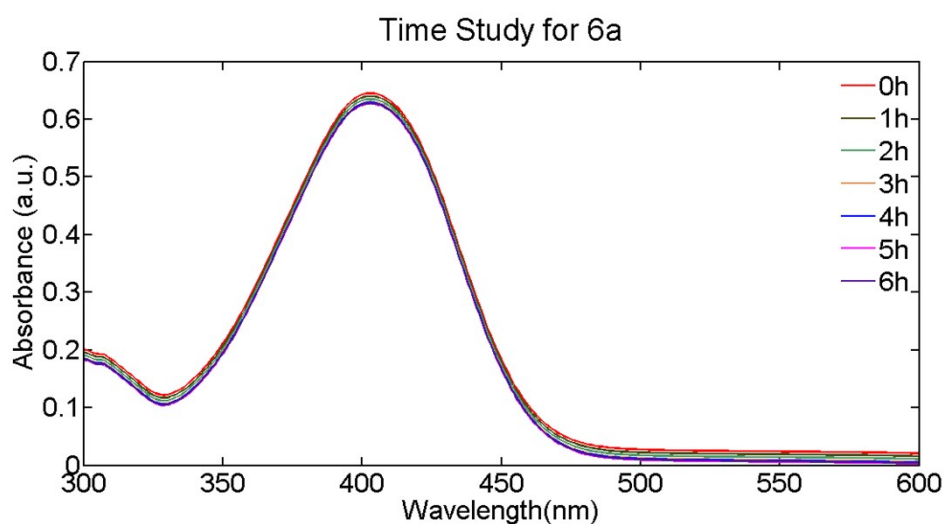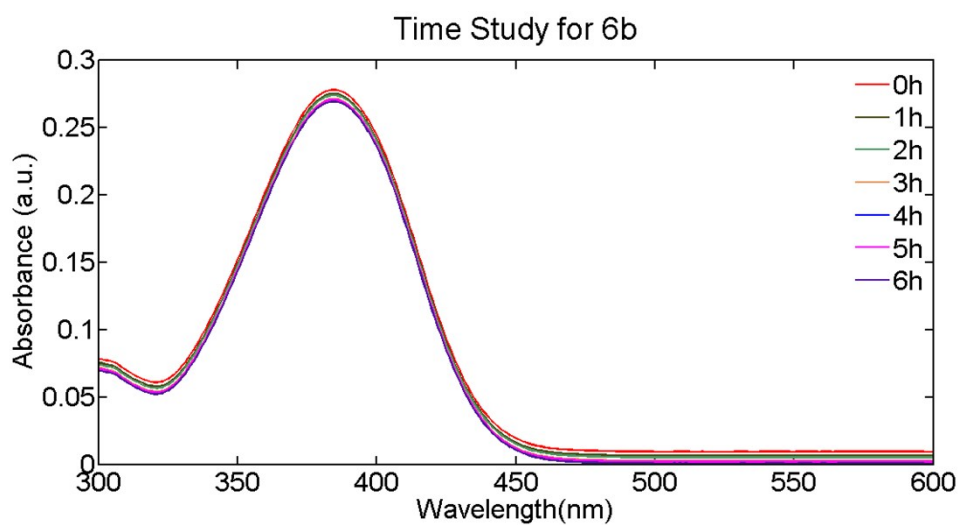

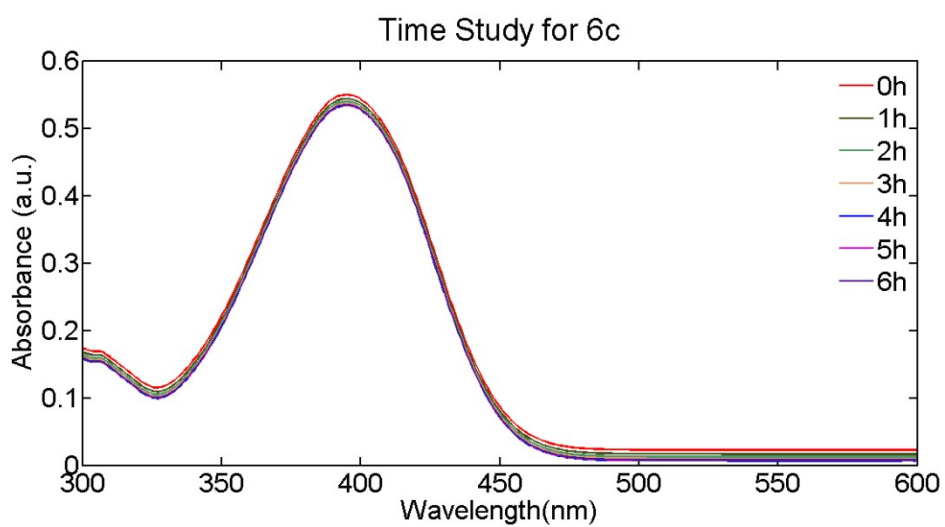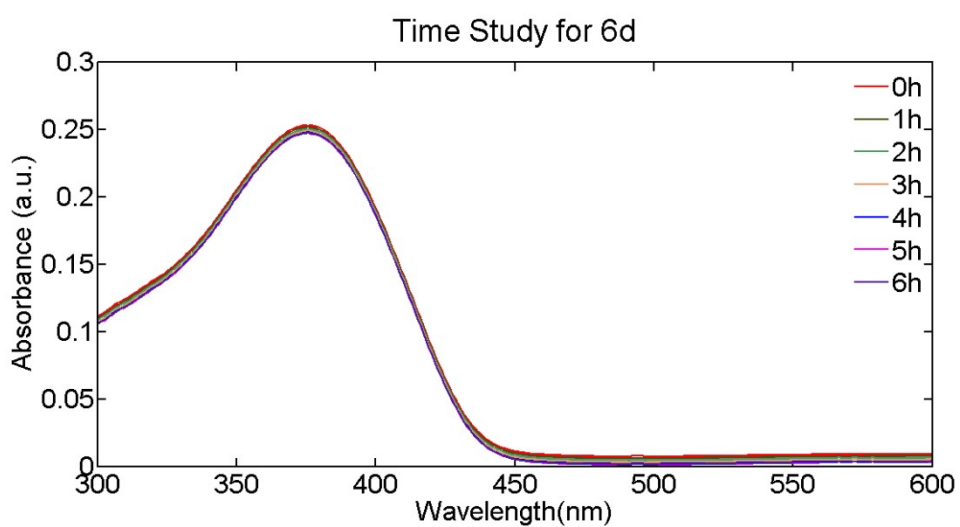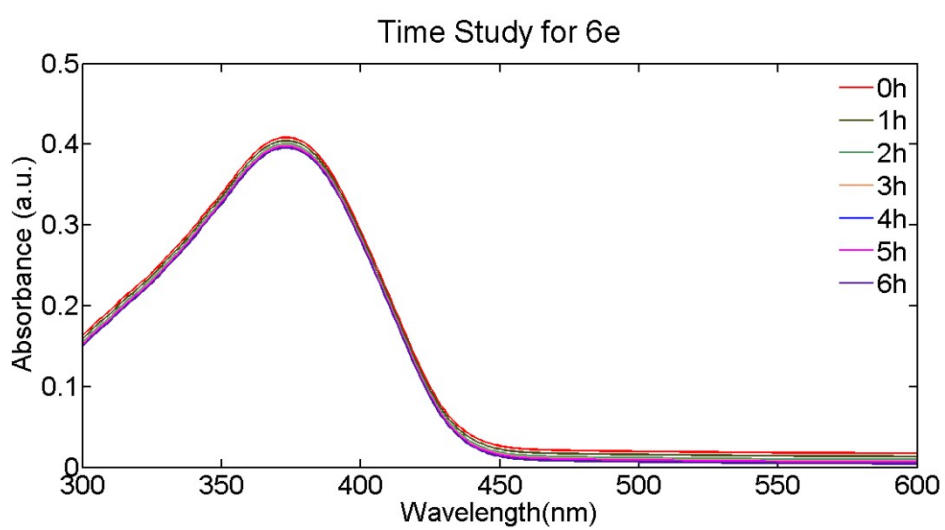

Figure S6. Uv-vis spectra of photostability study for dye **6a-6e**.



### 3. FT-IR spectra

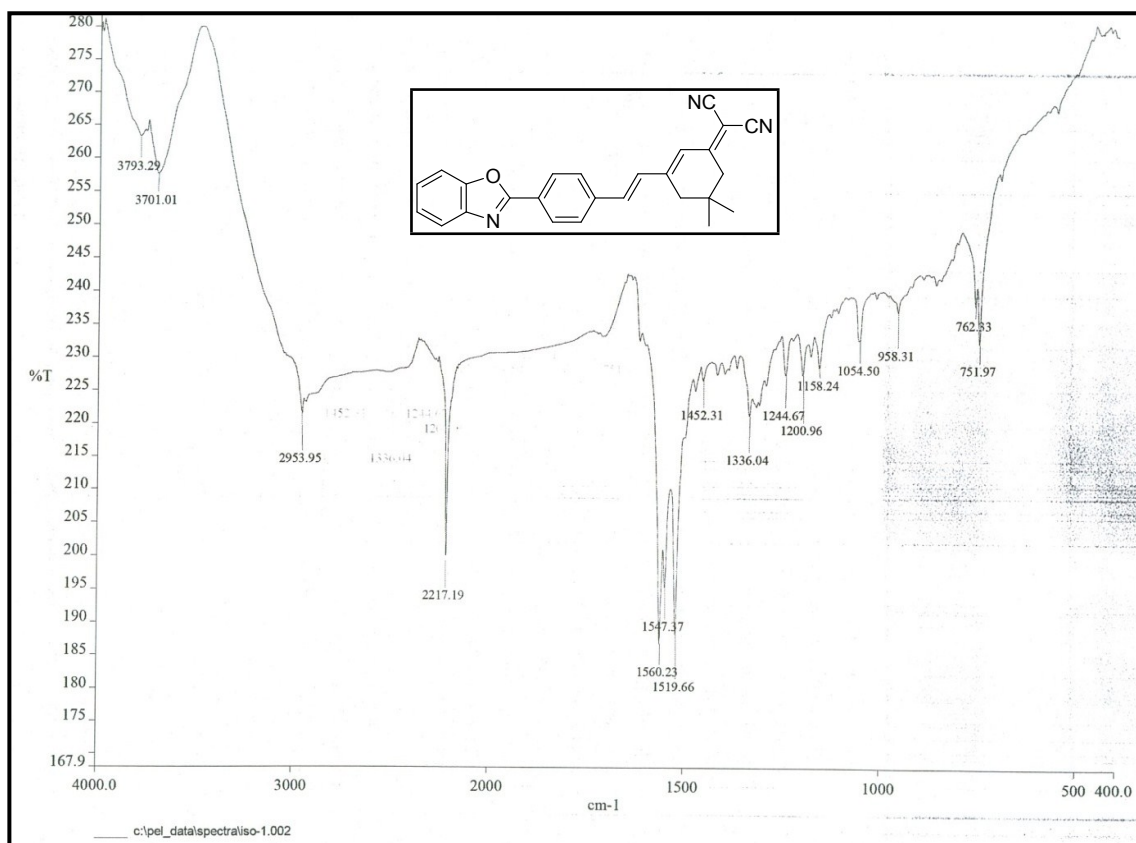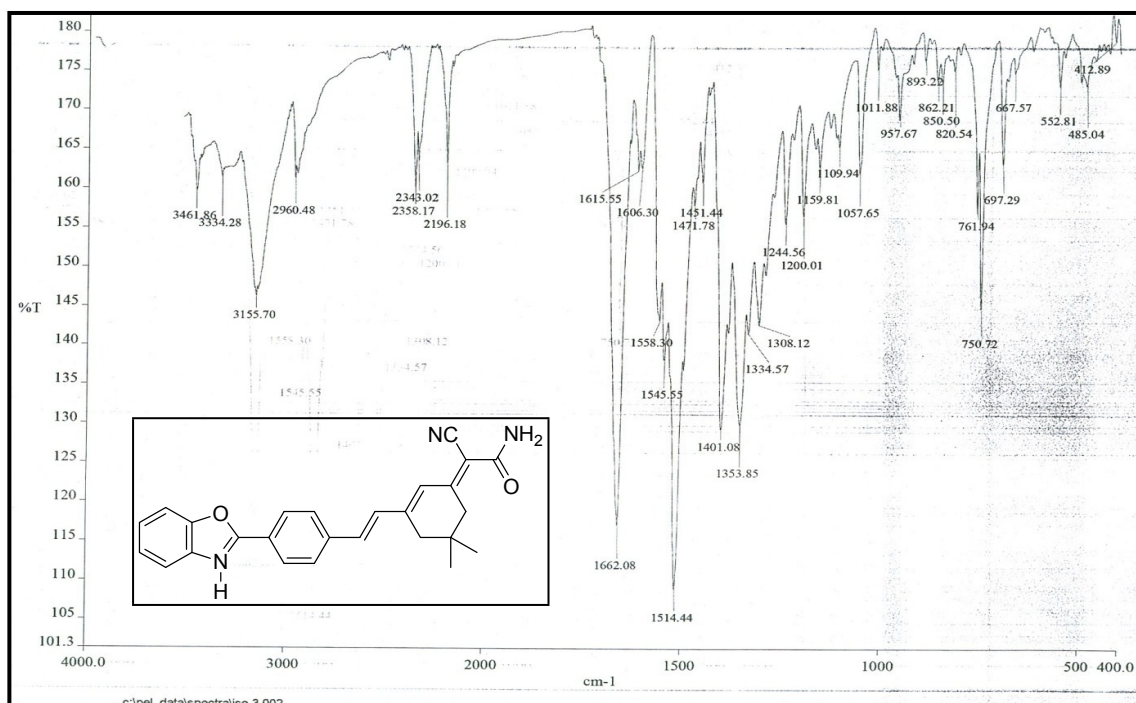

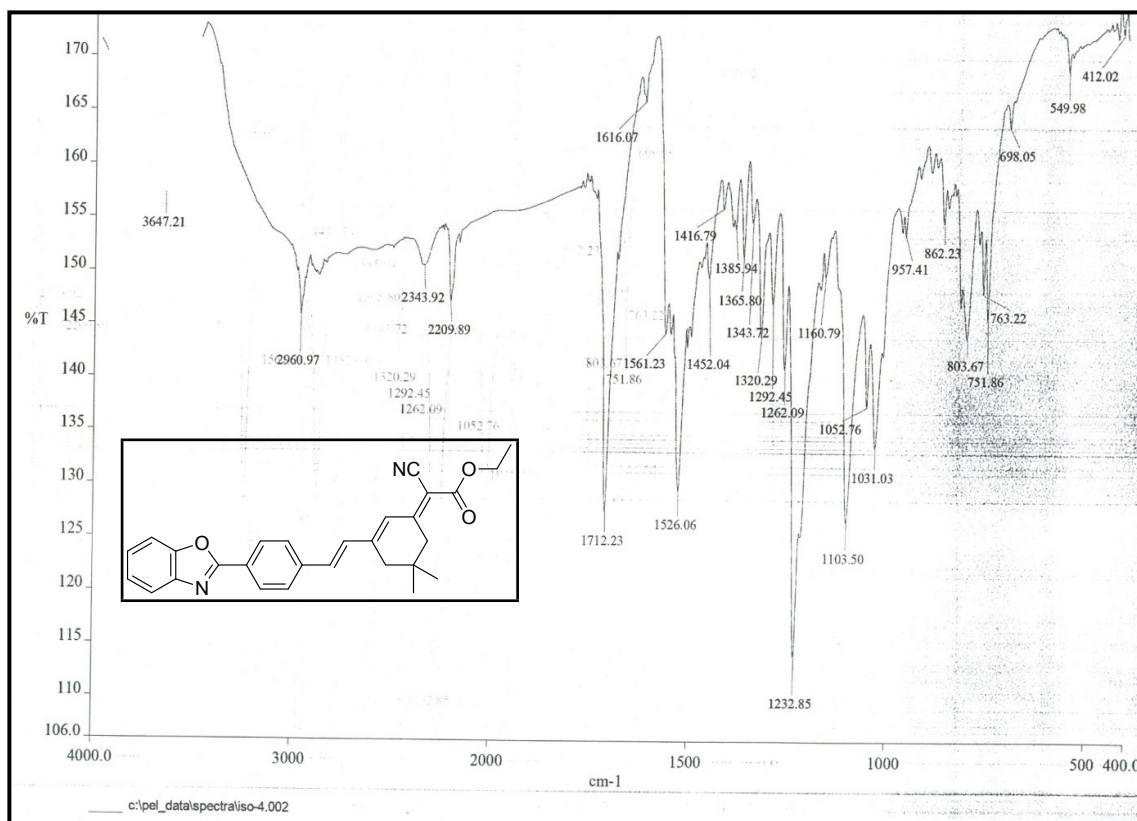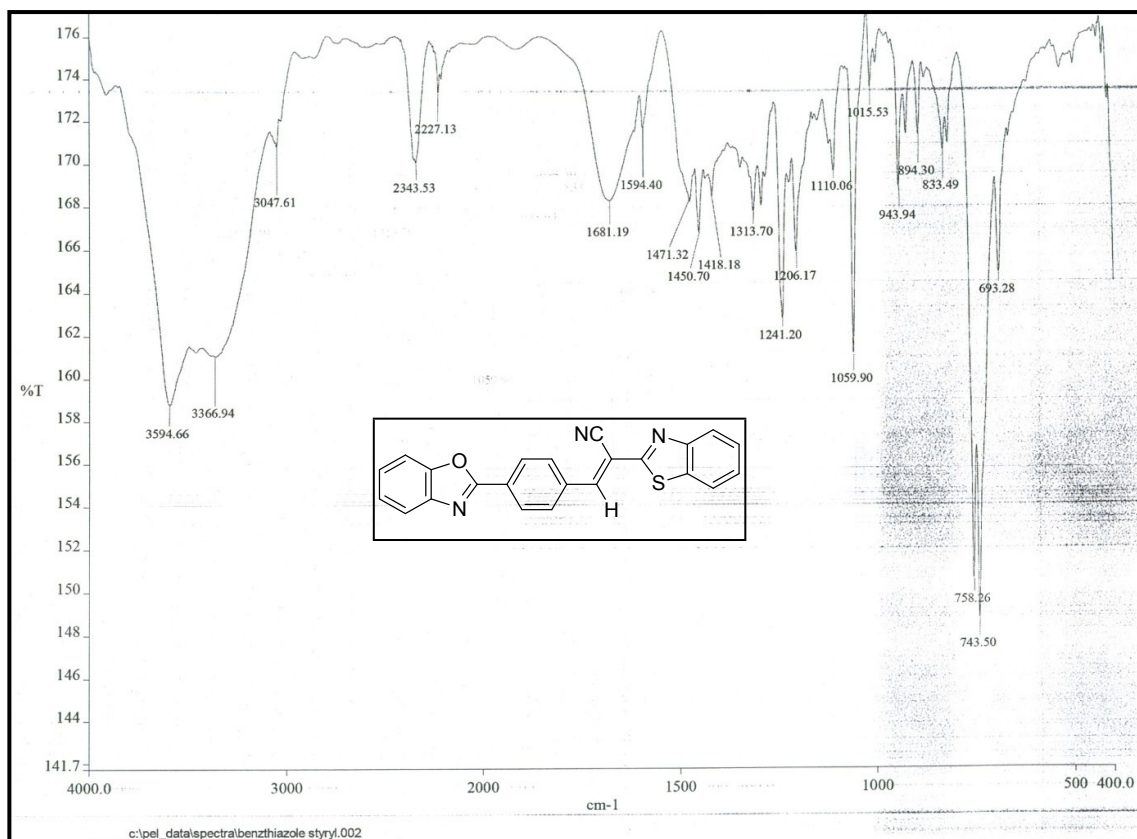



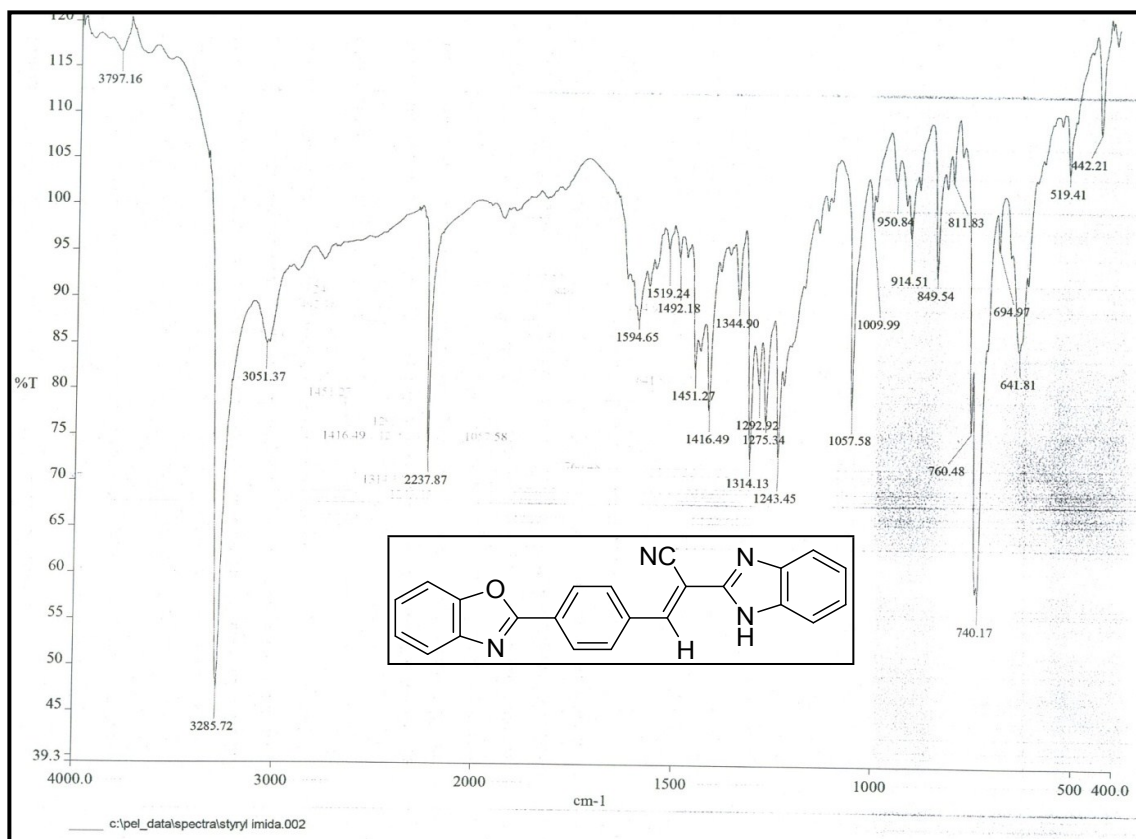

#### 4. HR-MS Spectra

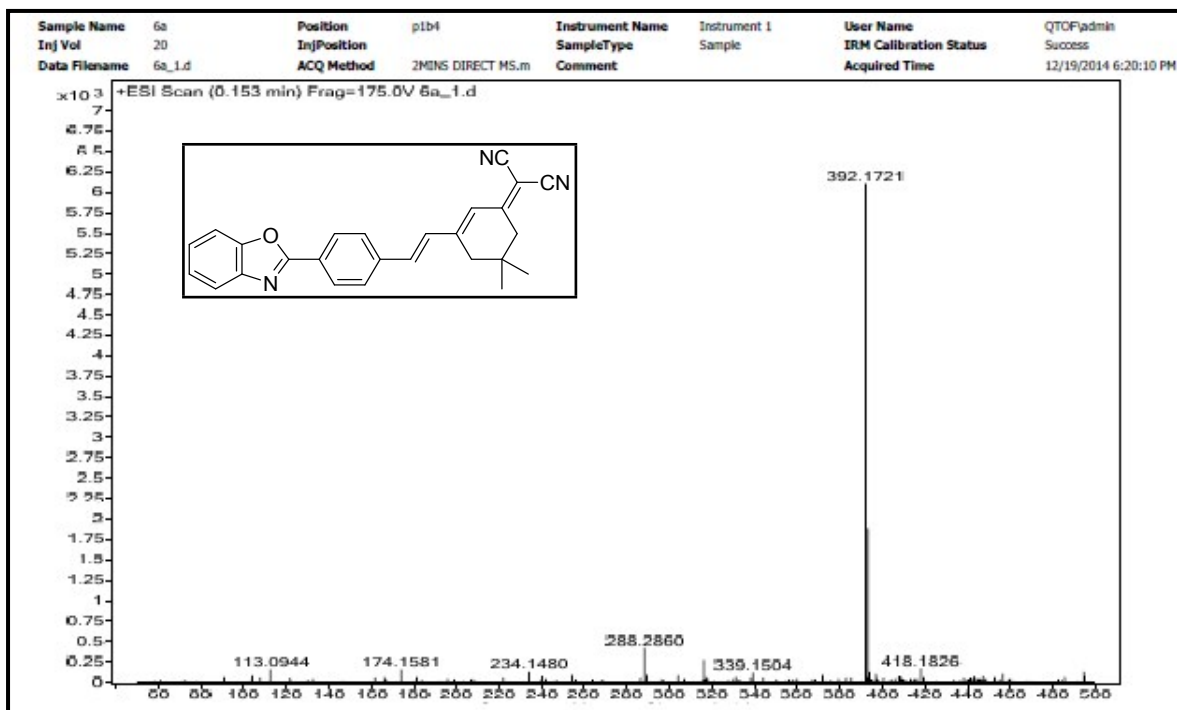

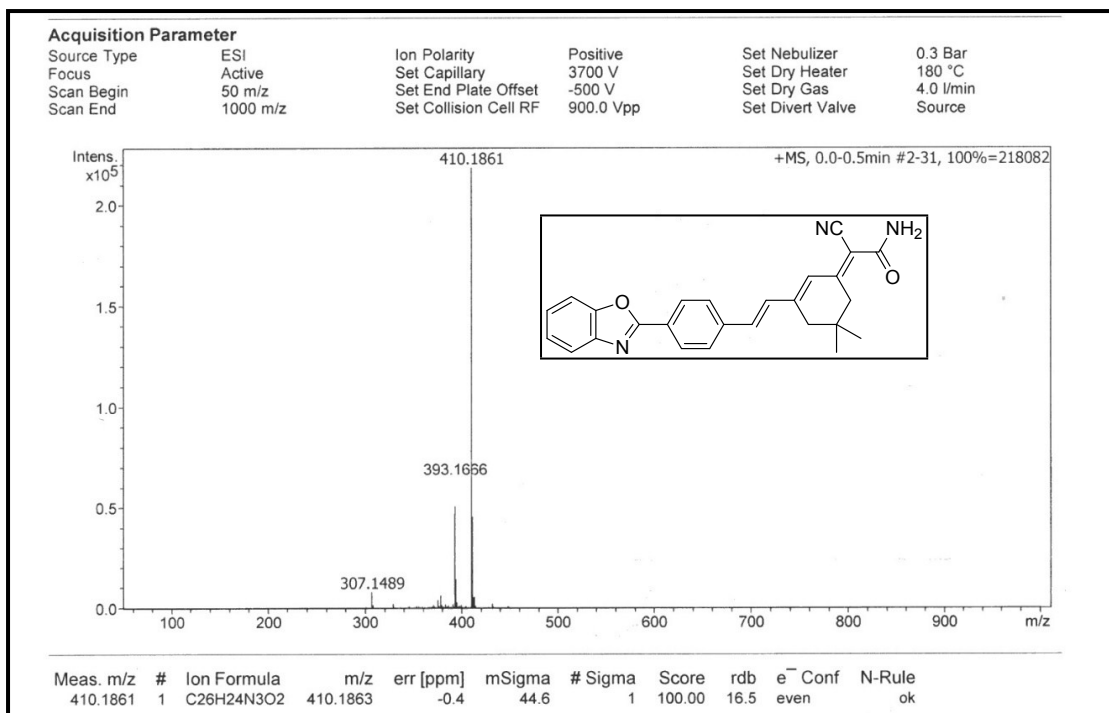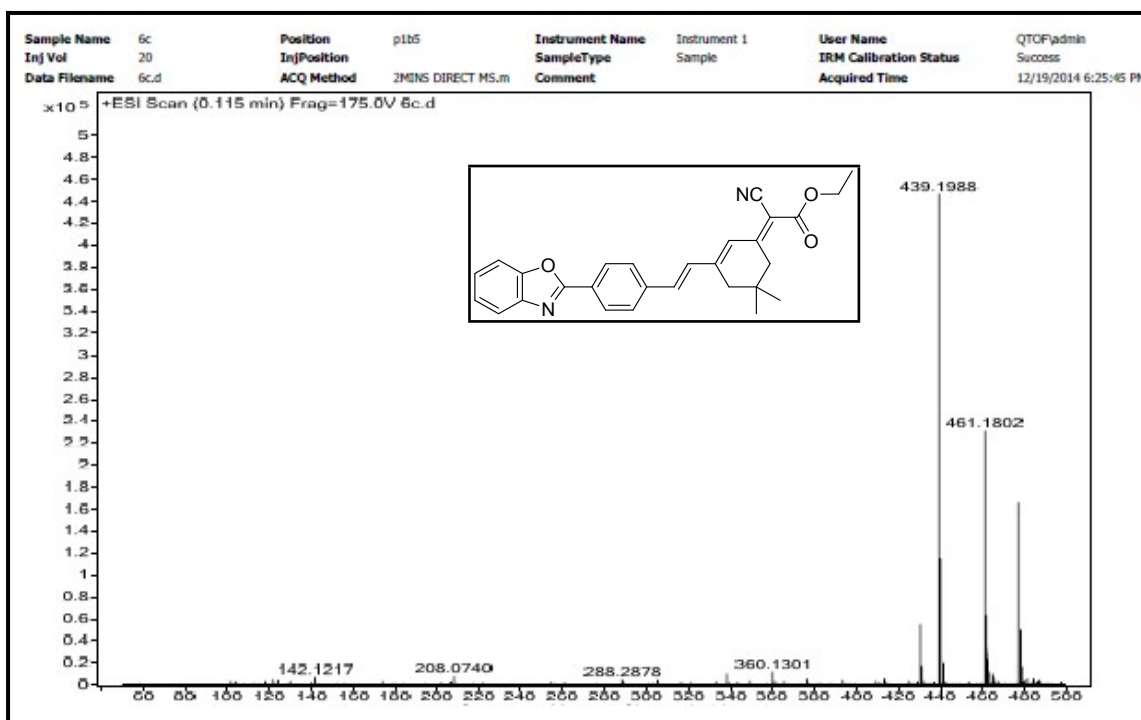

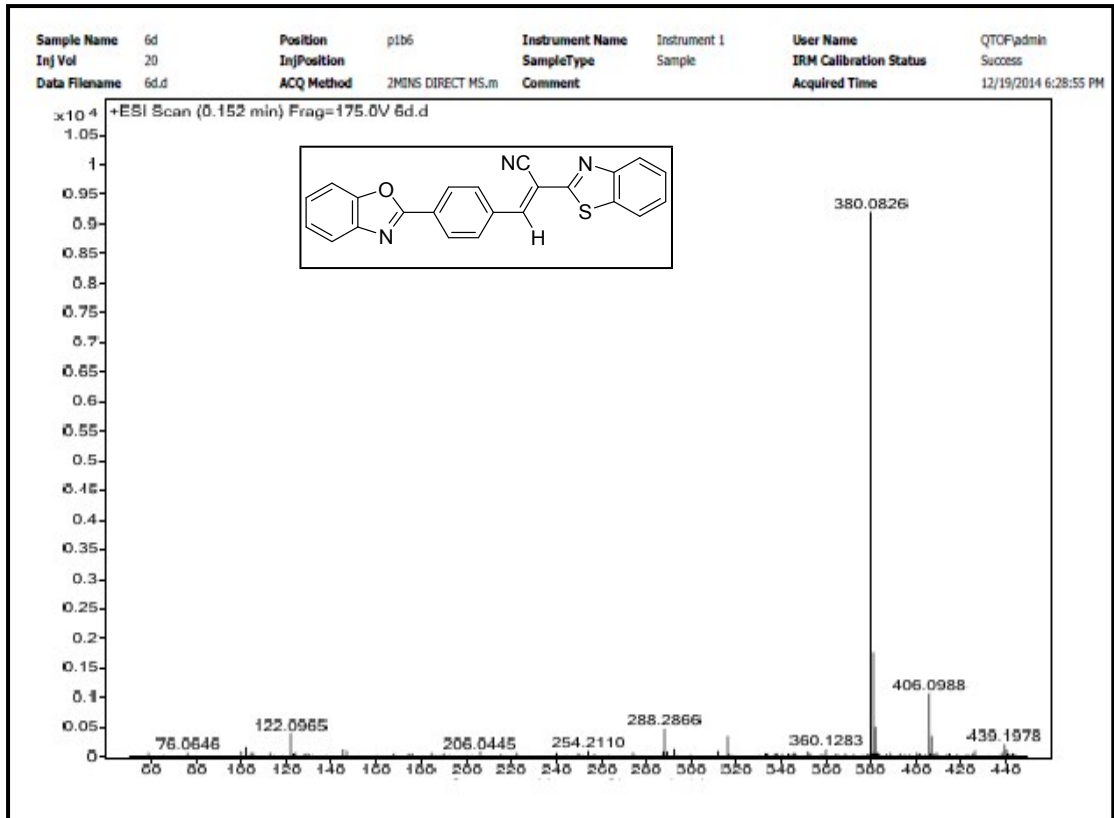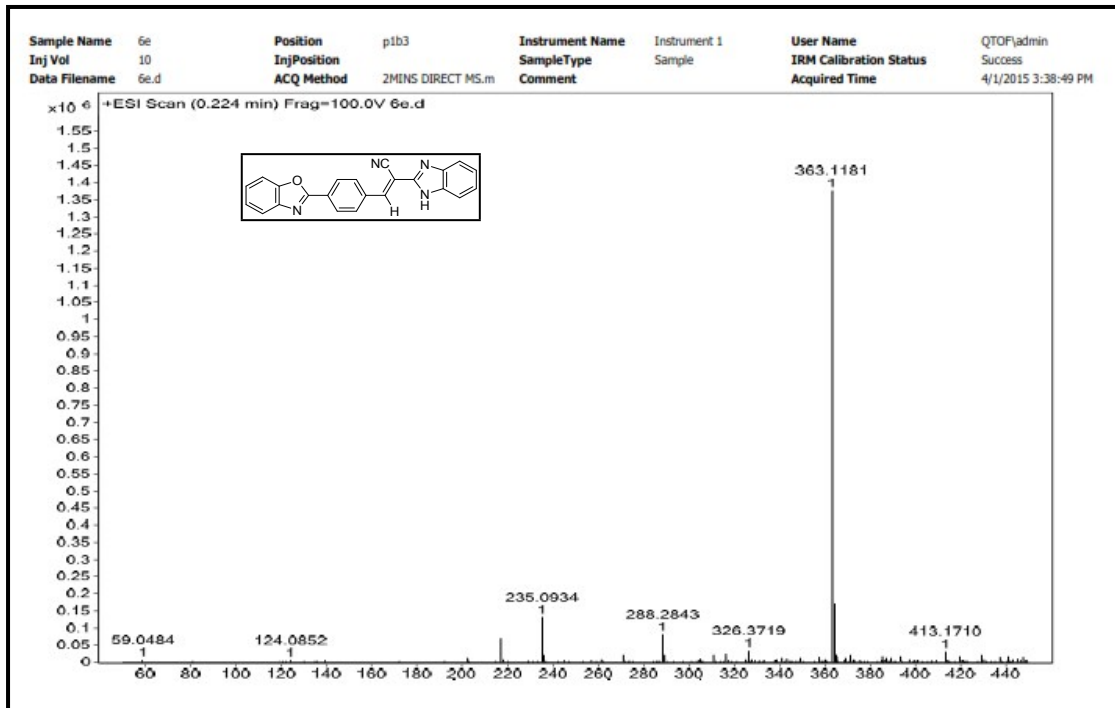

## 5. <sup>1</sup>H NMR spectra

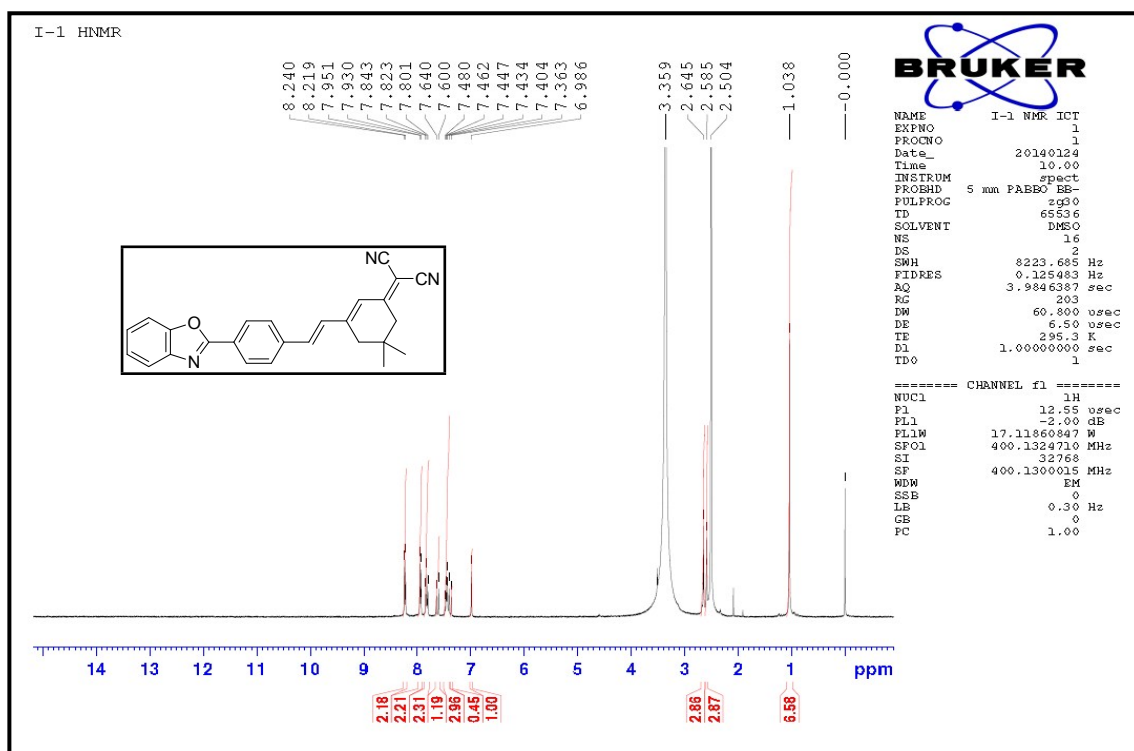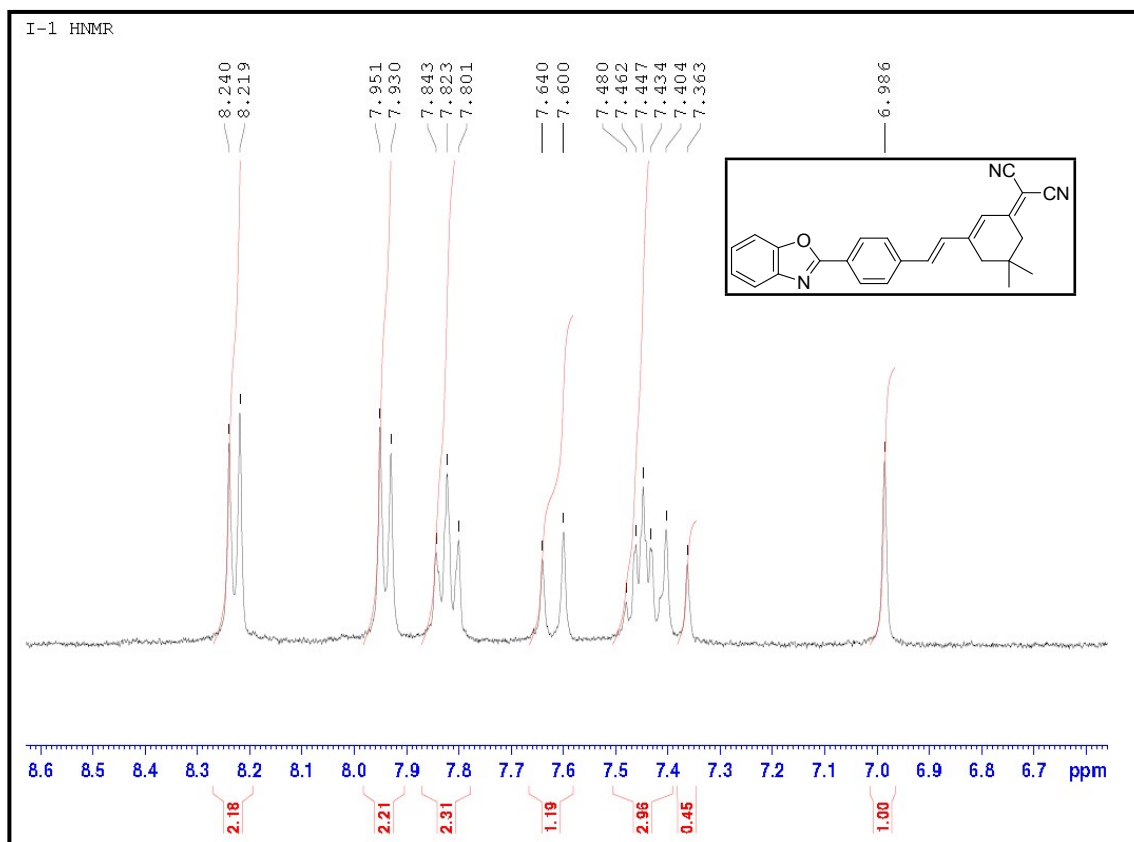

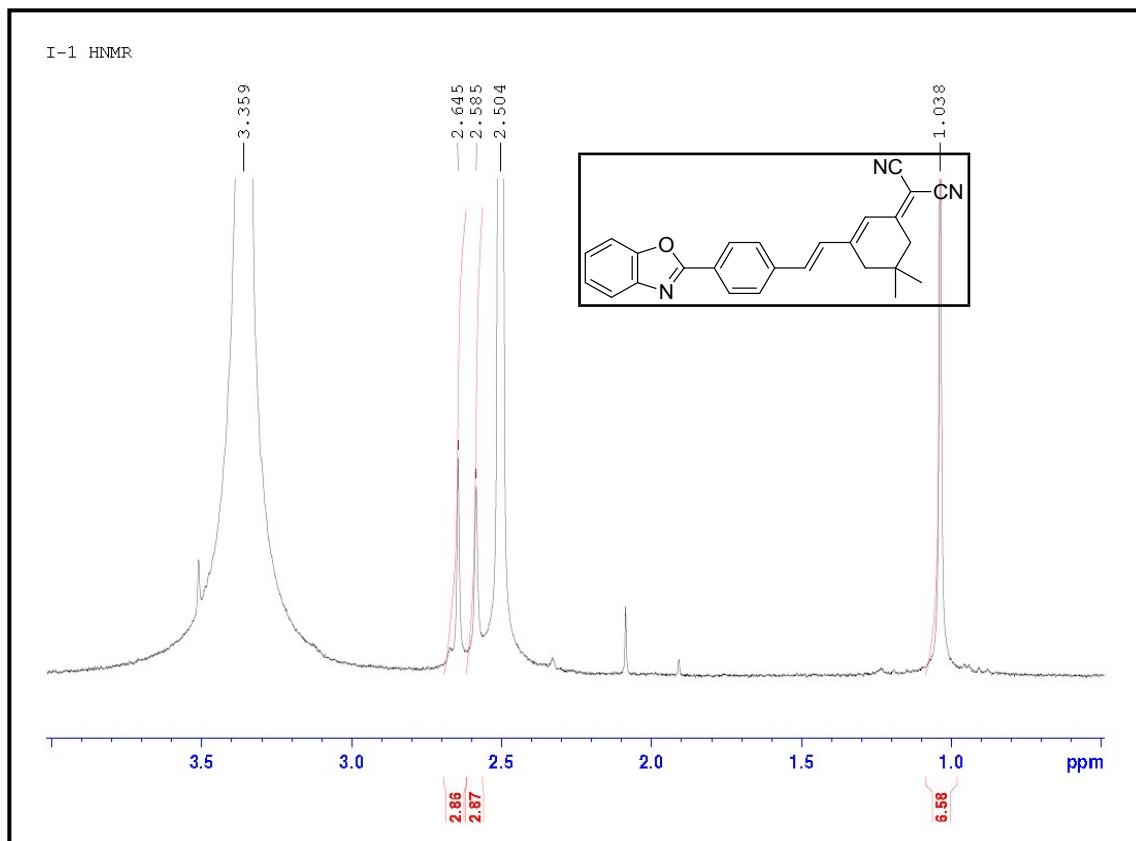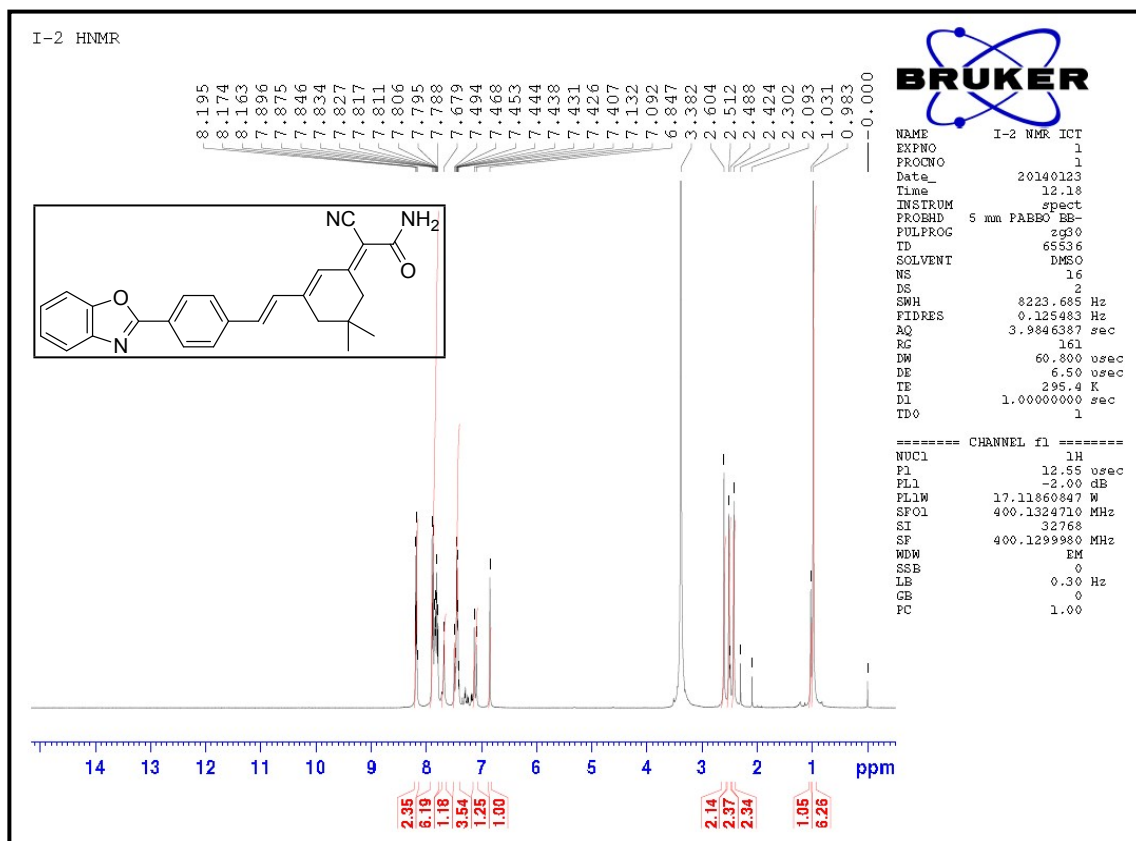



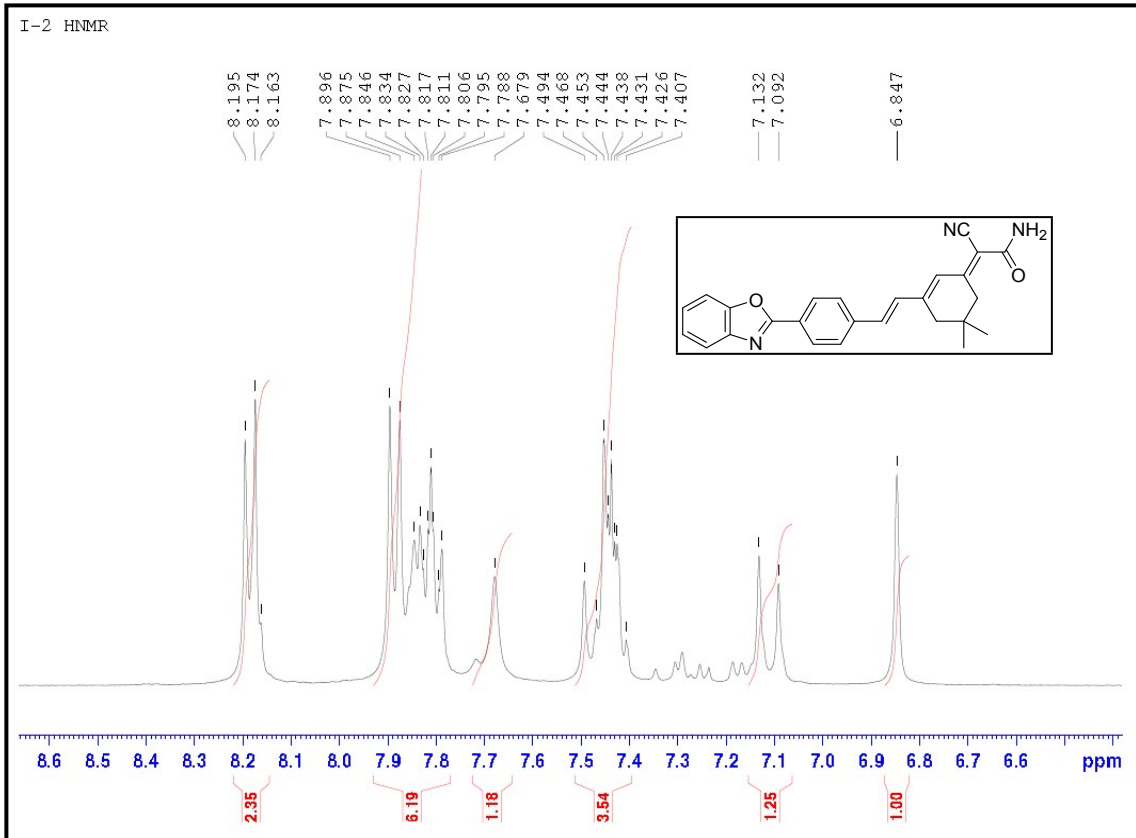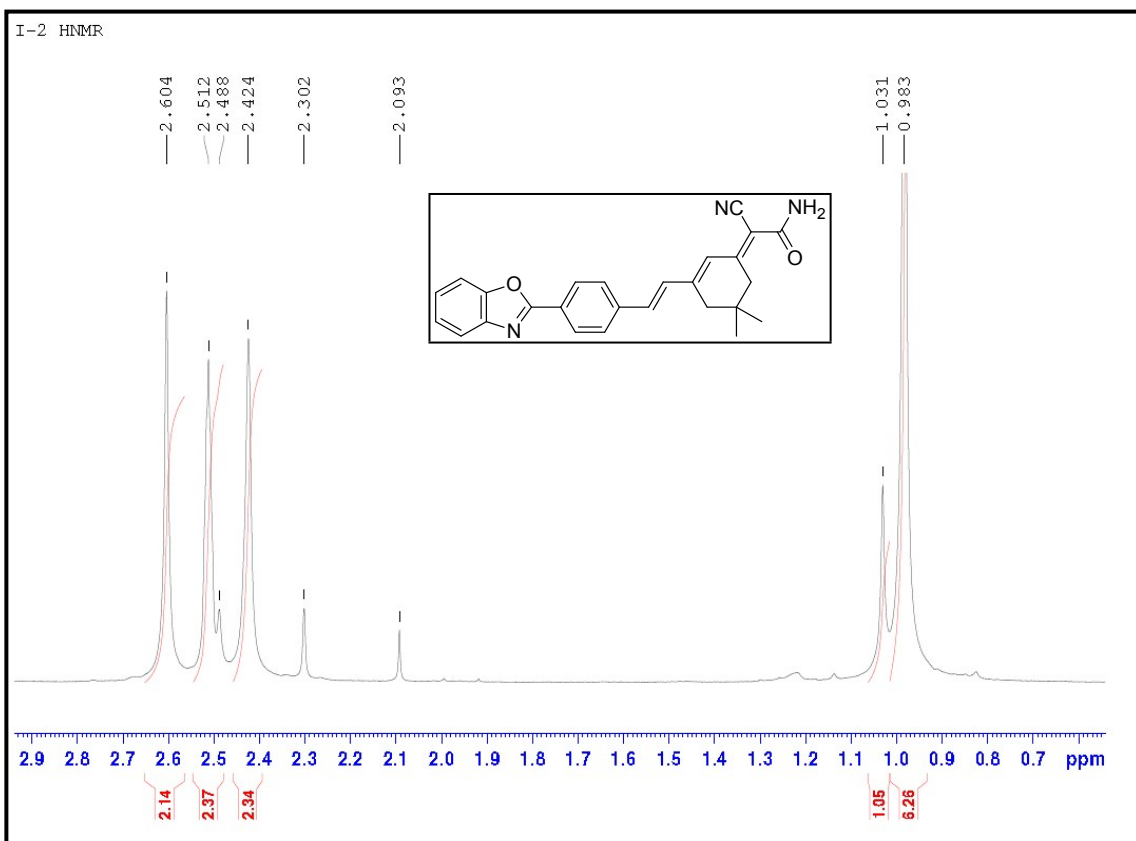

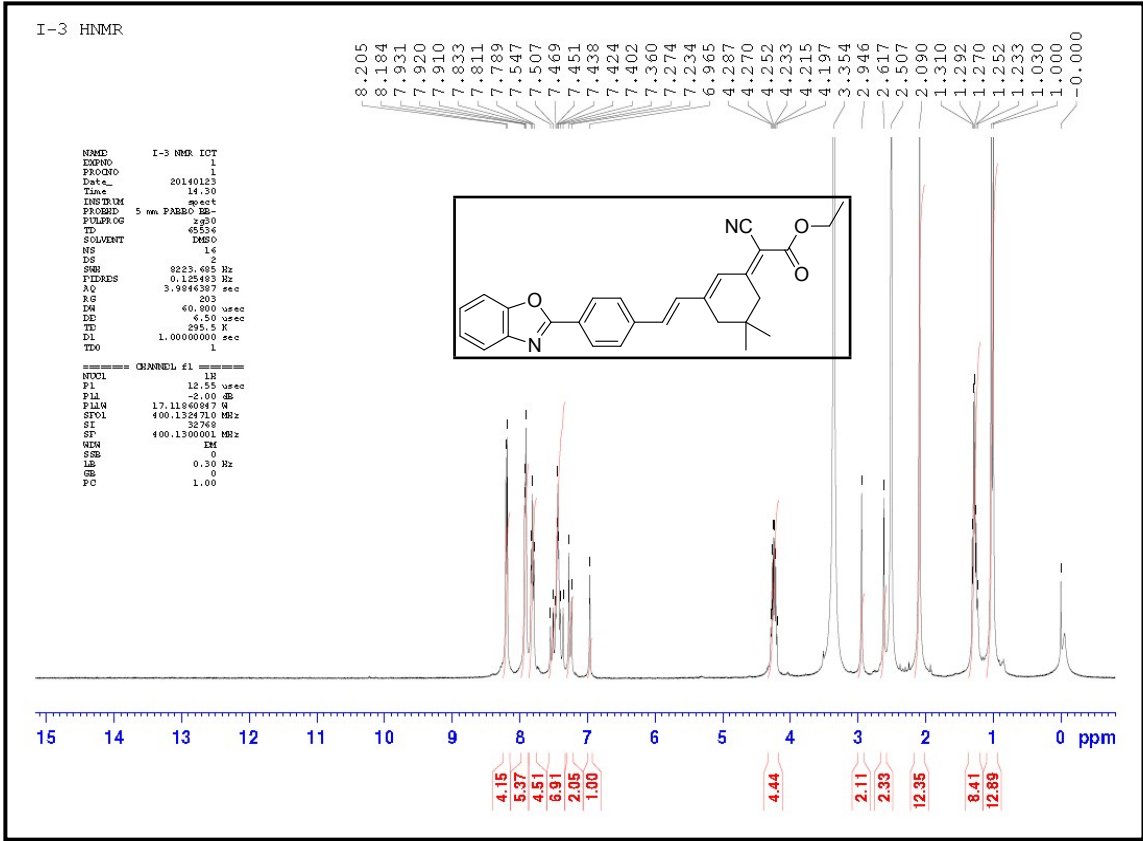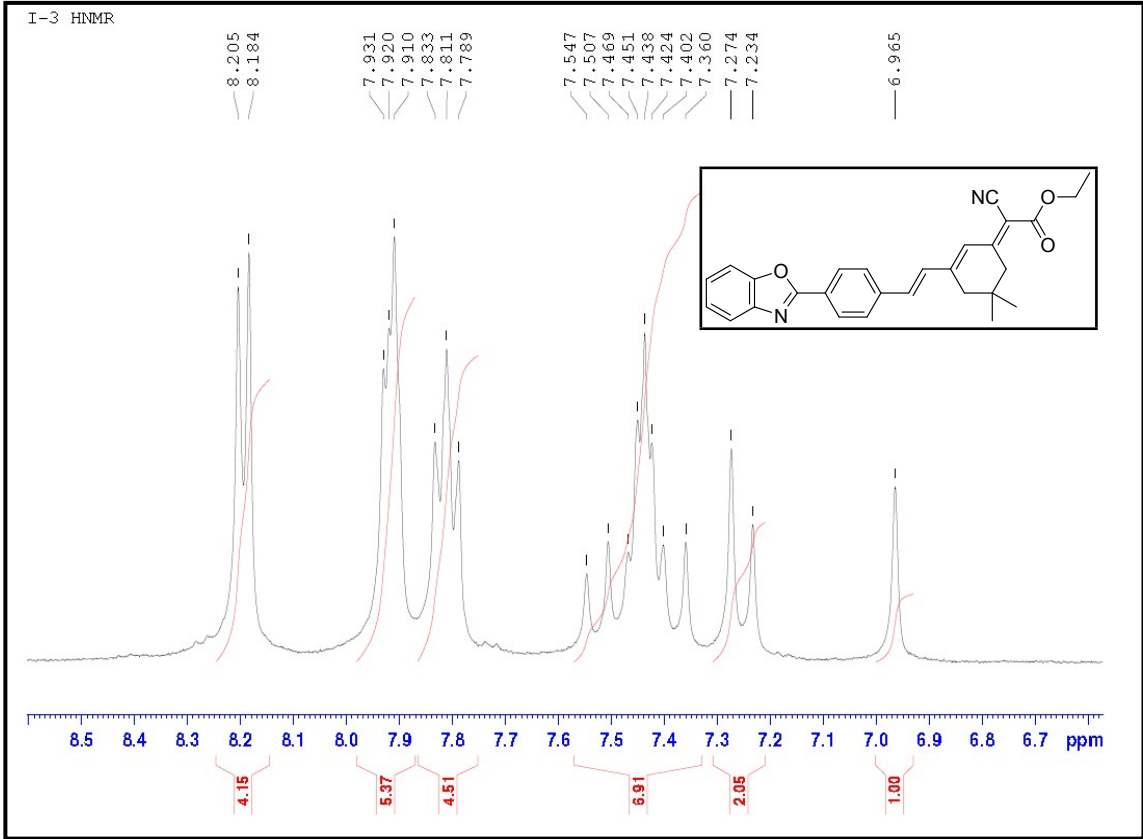

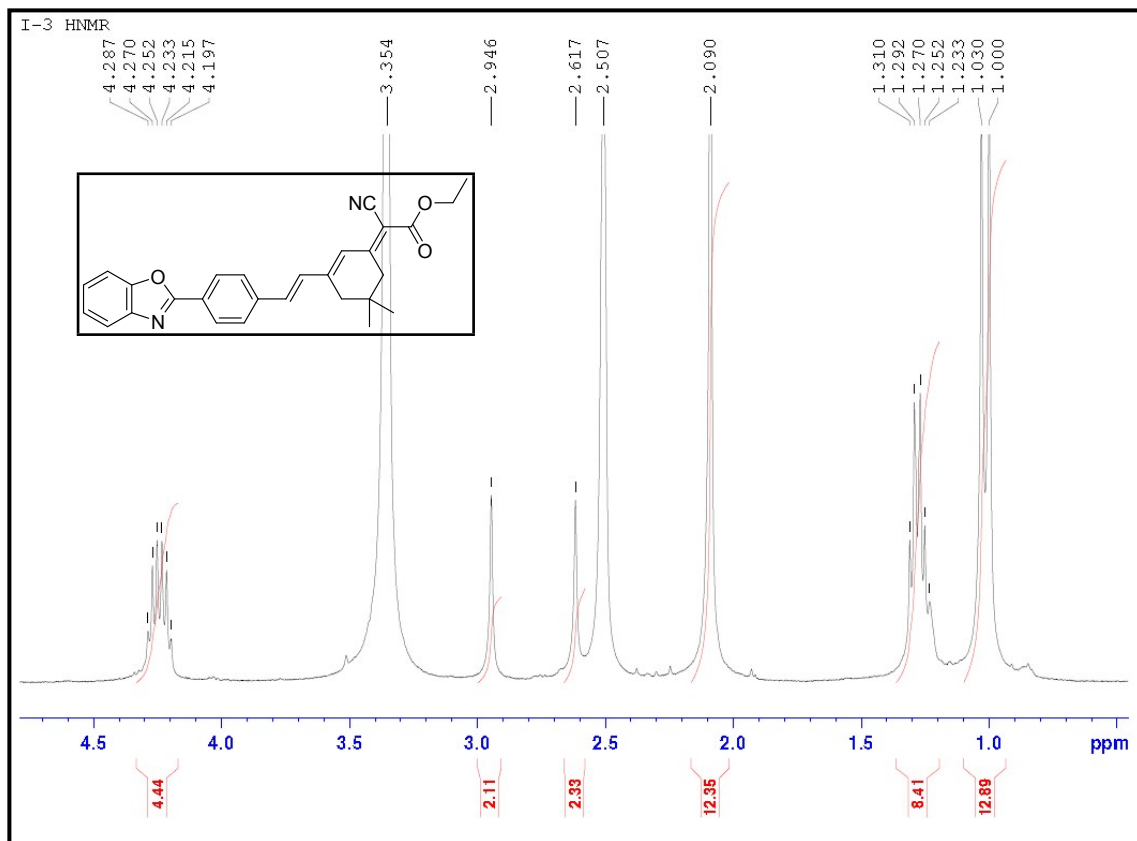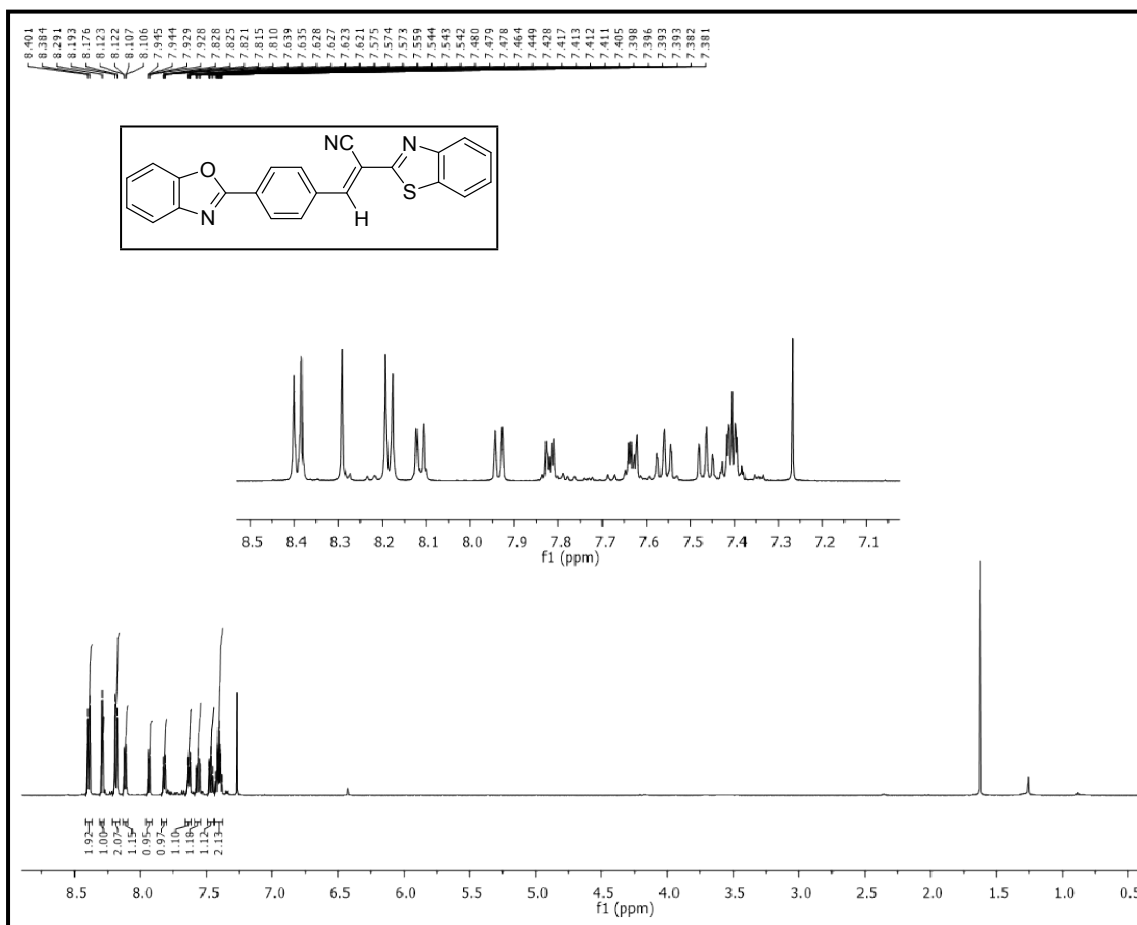

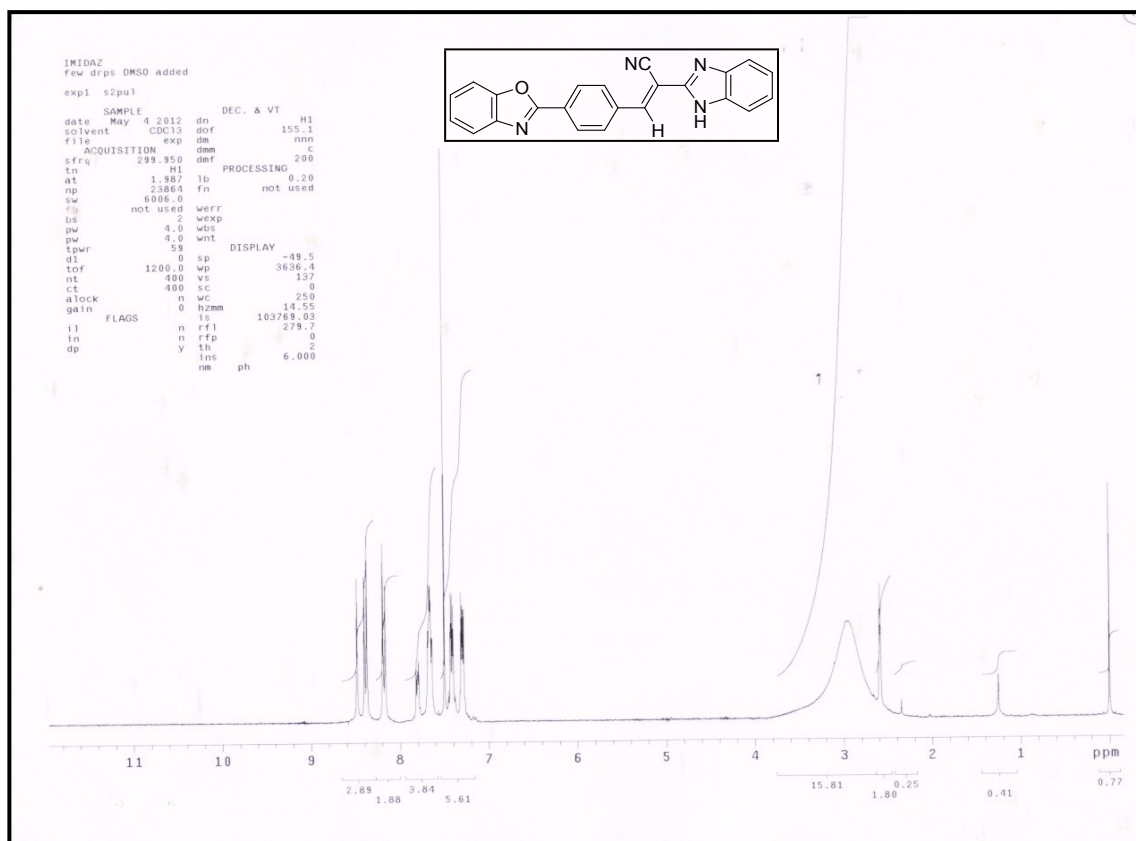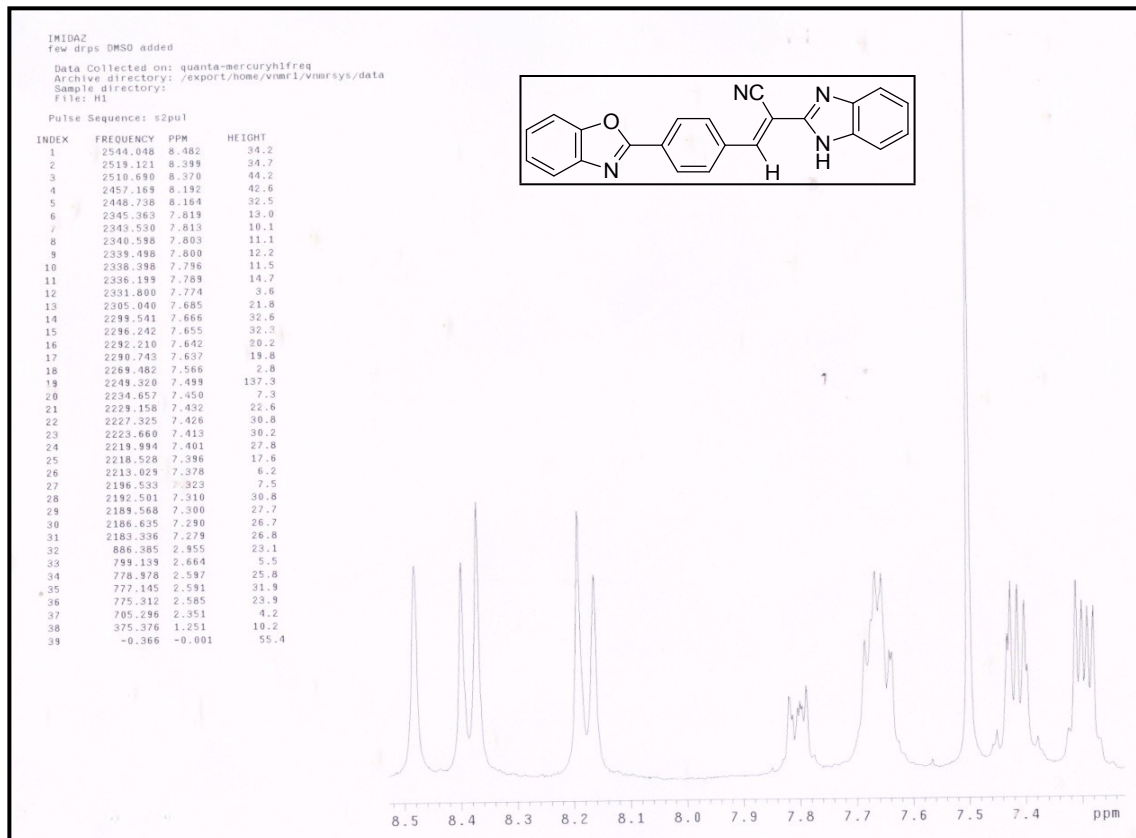

# C<sup>13</sup> -NMR spectra

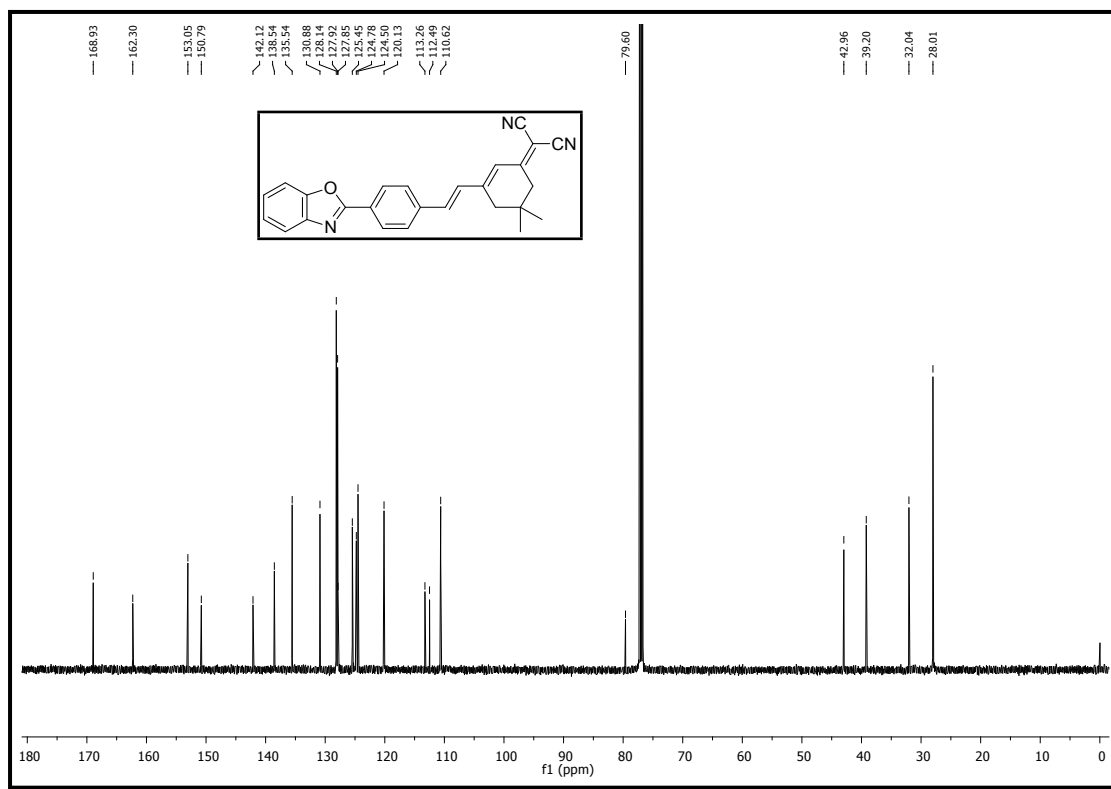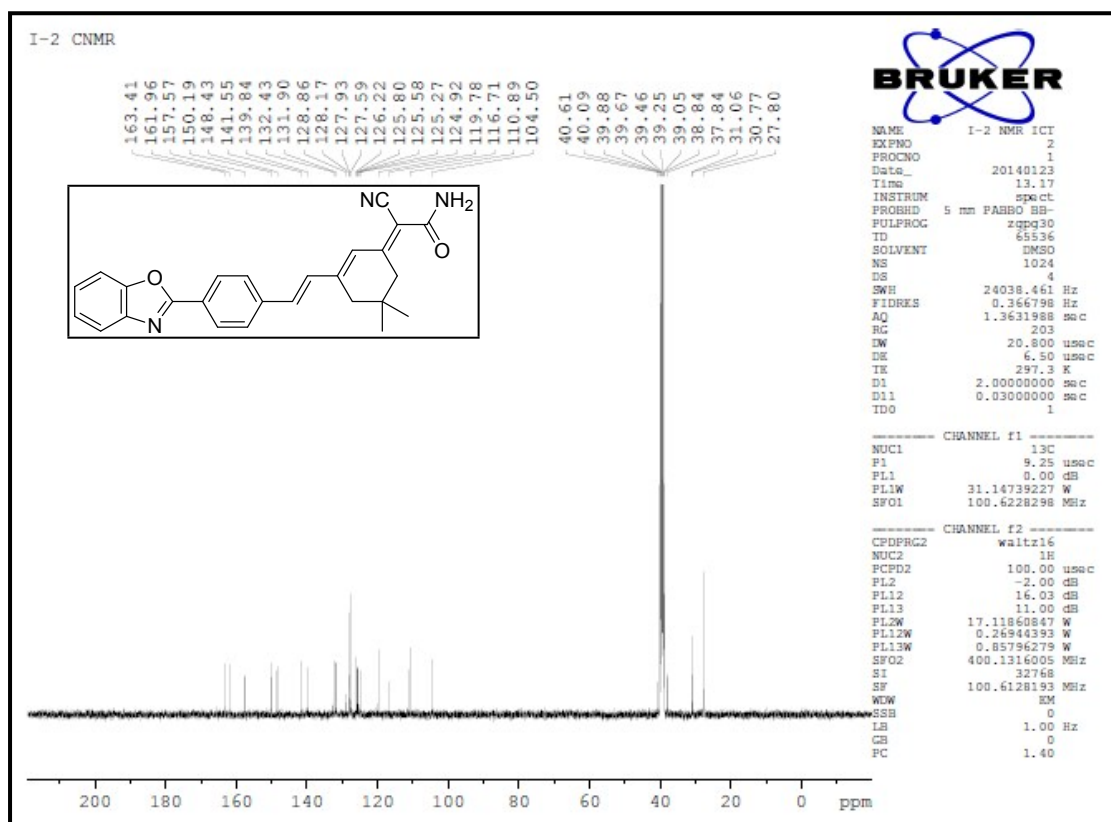



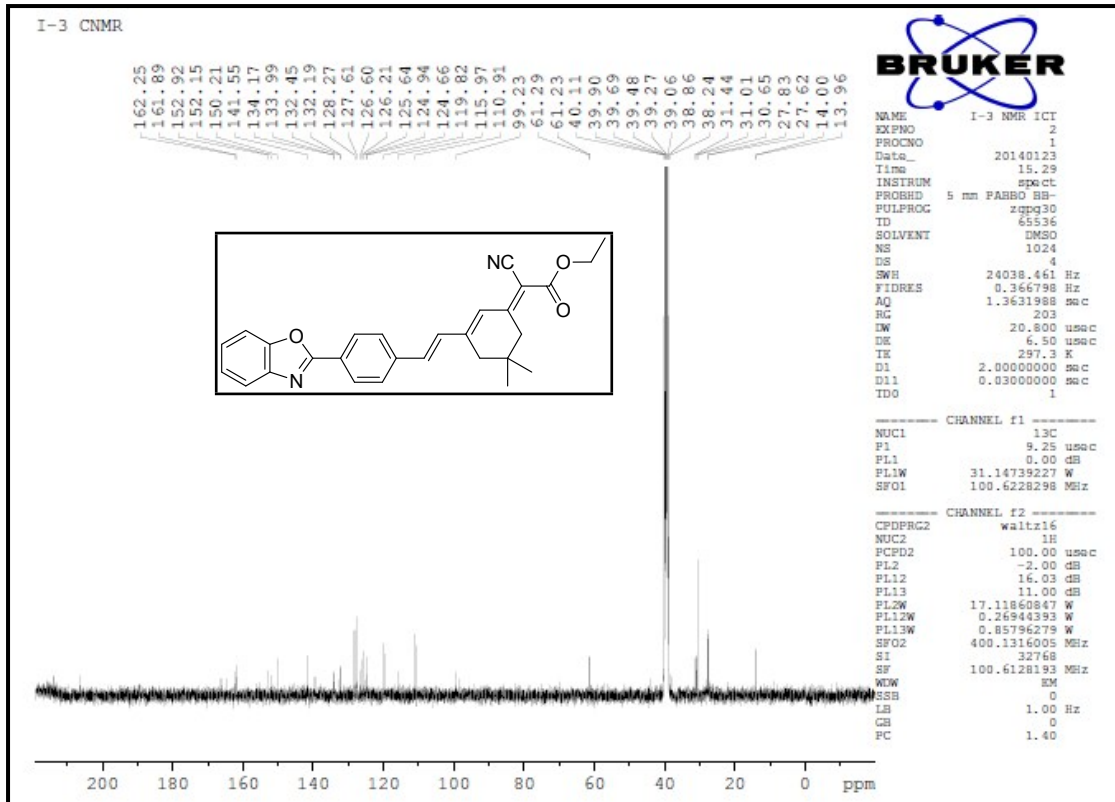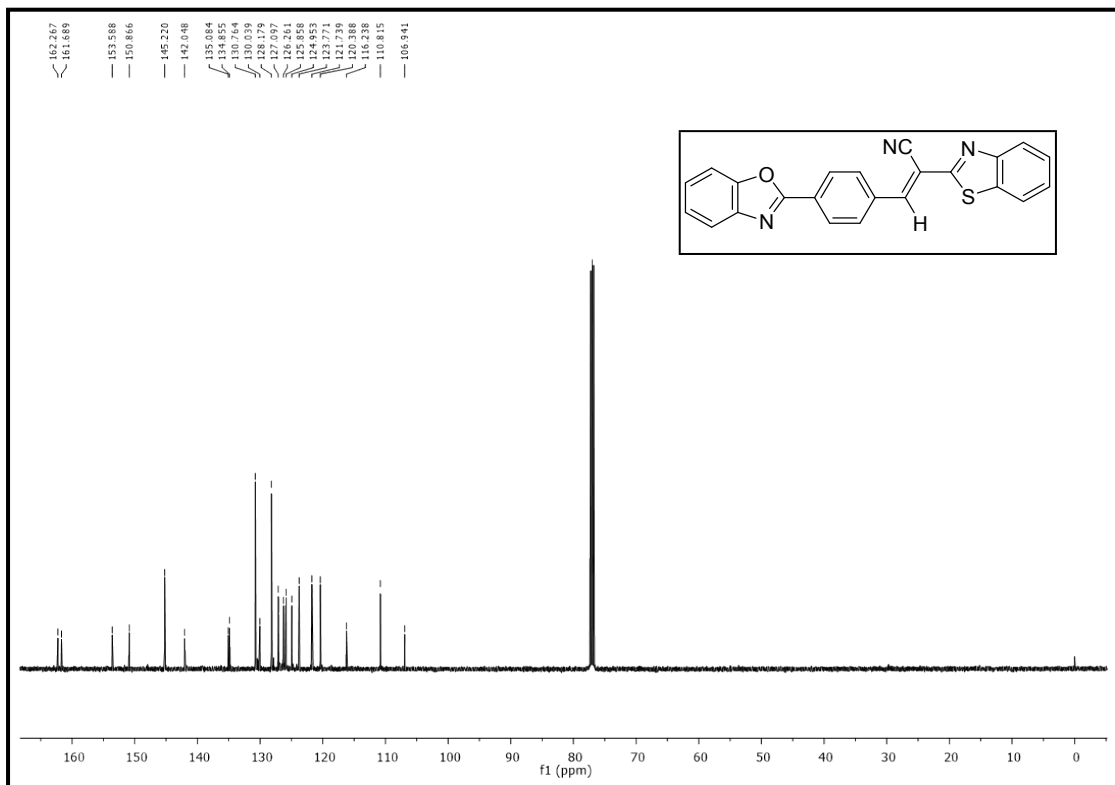

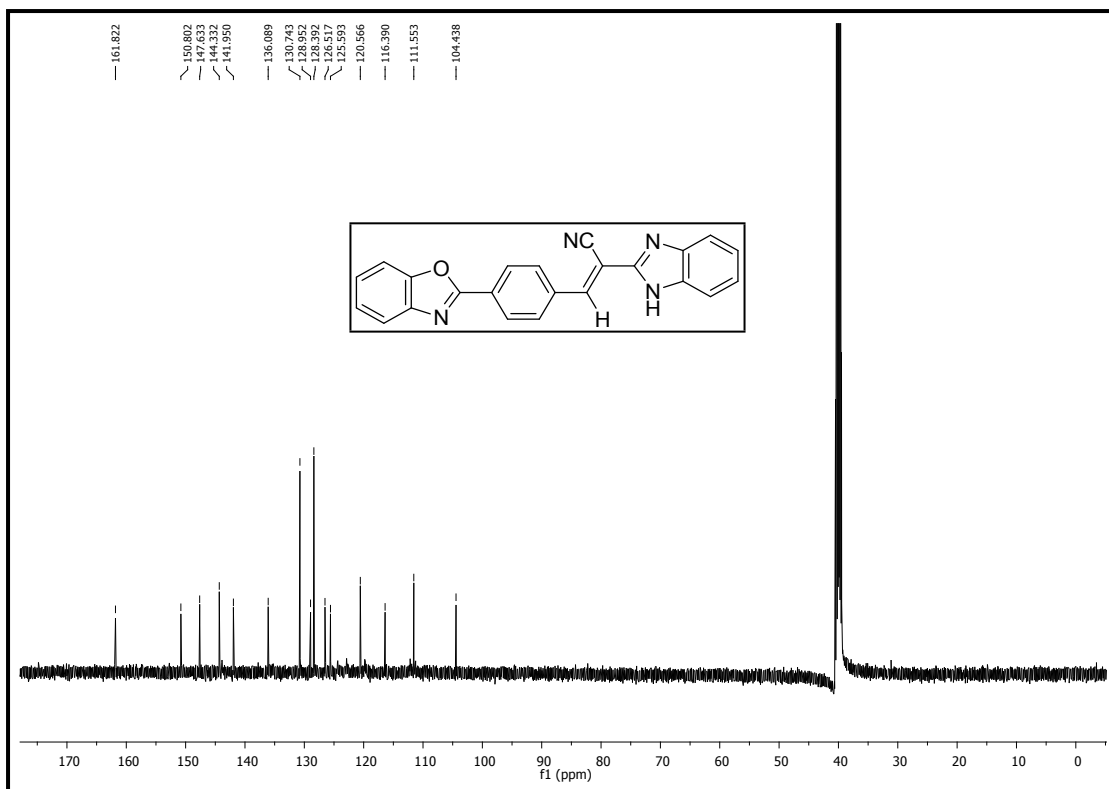

Supplement: c4ra12908c1.pdf [file c4ra12908c1.pdf]
